# Supplementary material
Source: MDPI journal article supplement (https://www.mdpi.com/2543-6031/91/1/8)
Supplement: s1 [file s1]

# Evaluation of Drug Interactions in Hospitalized Patients with Respiratory Disorders in Greece

Marios Spanakis <sup>1,2,\*</sup>, Petros Ioannou <sup>3</sup>, Sotiris Tzalis <sup>3</sup>, Flora Chouzouri <sup>3</sup>, Evridiki Patelarou <sup>1</sup>, Diamantis P. Kofteridis <sup>3</sup>, Katerina M. Antoniou <sup>4</sup>, Sophia E. Schiza <sup>5</sup>, Athina Patelarou <sup>1</sup> and Nikos Tzanakis <sup>4</sup>

<sup>1</sup> Department of Nursing, School of Health Sciences, Hellenic Mediterranean University, 71004 Heraklion, Crete, Greece

<sup>2</sup> Computational Biomedicine Laboratory, Institute of Computer Science, Foundation for Research & Technology-Hellas (FORTH), GR-70013 Heraklion, Crete, Greece

<sup>3</sup> Department of Internal Medicine & Infectious Diseases, University Hospital of Heraklion, 71110 Heraklion, Crete, Greece

<sup>4</sup> Department of Respiratory Medicine, University Hospital of Heraklion, Medical School, University of Crete, 71003 Heraklion, Crete, Greece

<sup>5</sup> Sleep Disorders Unit, Department of Respiratory Medicine, Medical School, University of Crete, 71003 Heraklion, Crete, Greece

\* Correspondence: marspan@ics.forth.gr

The supplementary file contains additional information as supplementary tables (ST) regarding the scientific data that were presented in the manuscript

Figure S1 Gender, age distribution and clinical values for kidney and liver function as extracted from the medical records from participants in the study. CRP: C - reactive protein, SGPT: serum glutamic-pyruvic transaminase, SGOT: serum glutamic oxaloacetic transaminase, AL: Alkaline phosphatase

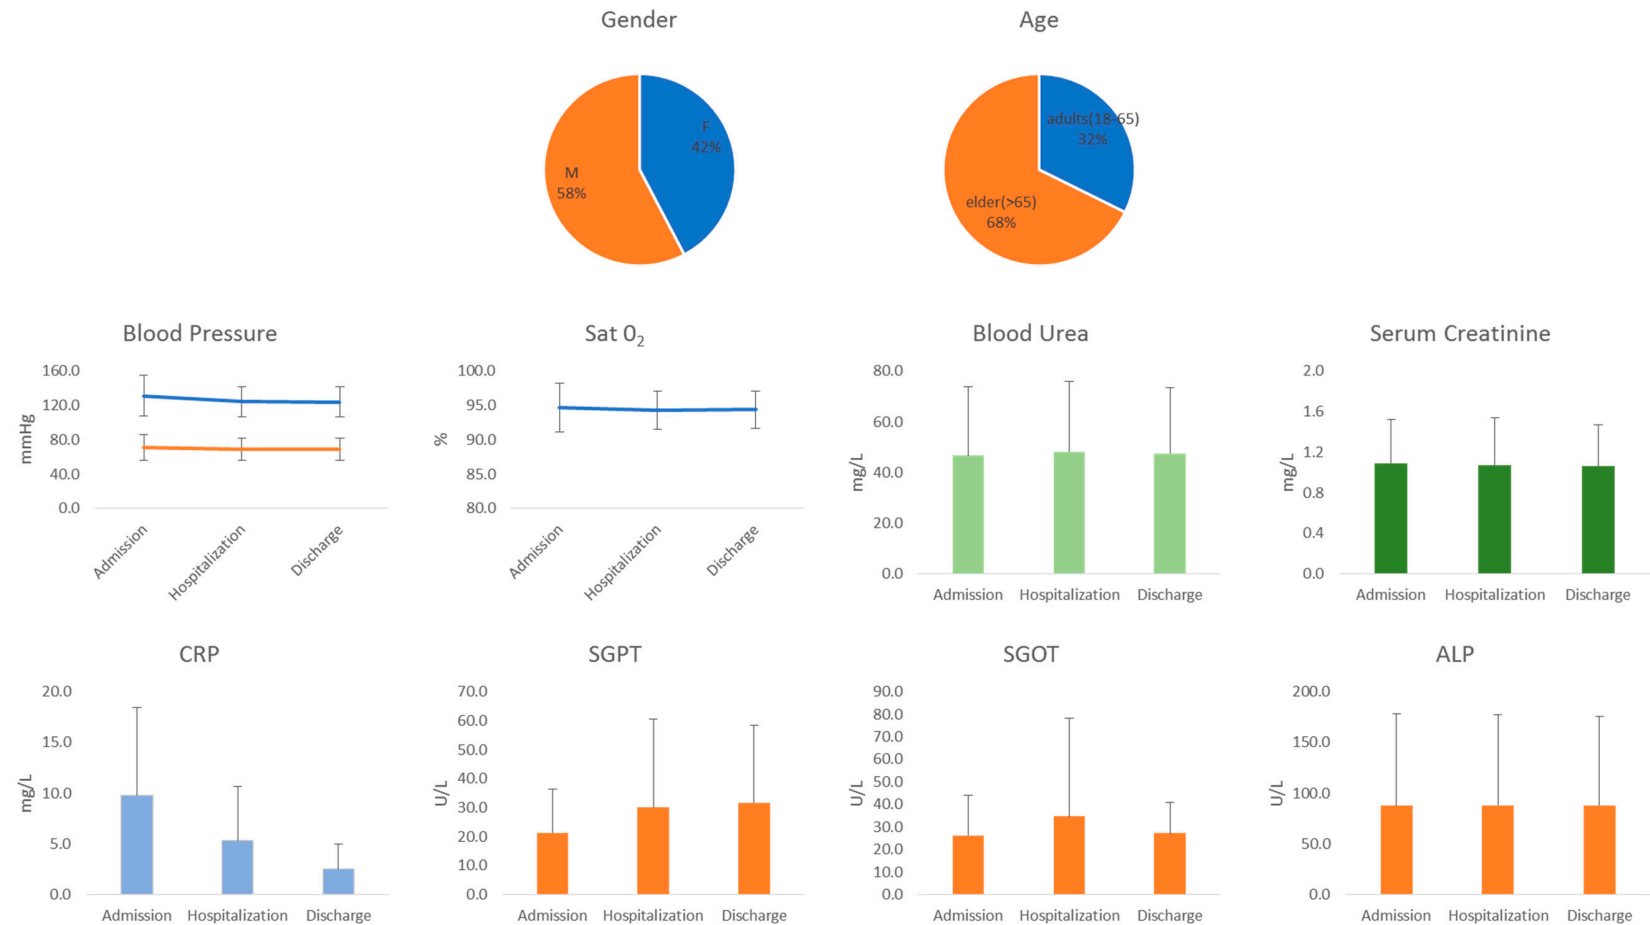

Table S1: Drug combinations that may lead in pharmacokinetic DDIs as they recorded in the current study. SUA: Serious-Use alternative, Monitor: use with caution-monitor, Moderate: moderate-minor, frequency: number of cases

| Drug A          | ATC | Drug B        | ATC | Frequency | Significance | Description                              |
|-----------------|-----|---------------|-----|-----------|--------------|------------------------------------------|
| Allopurinol     | M04 | Furosemide    | C03 | 2         | Monitor      | Increased serum urate & Ct of oxypurinol |
| Amiodarone      | C01 | Atorvastatin  | C10 | 1         | Monitor      | P-gp inhibition                          |
| Amiodarone      | C01 | Carvedilol    | C07 | 1         | Monitor      | CYP2C9 inhibition                        |
| Amiodarone      | C01 | Dabigatran    | B01 | 2         | Monitor      | P-gp inhibition                          |
| Amiodarone      | C01 | Digoxin       | C01 | 1         | SUA          | P-gp inhibition                          |
| Amiodarone      | C01 | Lovastatin    | C10 | 1         | Monitor      | P-gp inhibition                          |
| Amitriptyline   | N06 | Carbamazepine | N03 | 1         | Monitor      | Induction of CYP3A4 metabolism           |
| Apixaban        | B01 | Carbamazepine | N03 | 1         | Monitor      | Induction of CYP3A4 metabolism           |
| Apixaban        | B01 | Itraconazole  | J02 | 1         | Monitor      | CYP3A4 inhibition                        |
| Azithromycin    | J01 | Dabigatran    | B01 | 1         | Monitor      | P-gp inhibition                          |
| Azithromycin    | J01 | Lovastatin    | C10 | 1         | Monitor      | CYP3A4 inhibition                        |
| Budesonide      | R03 | Silodosin     | G04 | 1         | Moderate     | Induction of CYP3A4 metabolism           |
| Carvedilol      | C07 | Dabigatran    | B01 | 1         | Monitor      | P-gp inhibition                          |
| Chloramphenicol | J01 | Alfuzosin     | G04 | 1         | Monitor      | CYP3A4 inhibition                        |
| Chloramphenicol | J01 | Haloperidol   | N05 | 1         | Monitor      | CYP3A4 inhibition                        |
| Ciprofloxacin   | J01 | Metoprolol    | C07 | 1         | Moderate     | Reduced Clearance                        |
| Ciprofloxacin   | J01 | Rasagiline    | N04 | 1         | Monitor      | CYP1A2 inhibition                        |
| Clopidogrel     | B01 | Esomeprazole  | A02 | 9         | SUA          | CYP2C19 inhibition                       |
| Codeine         | N02 | Fluoxetine    | N06 | 1         | Moderate     | CYP2D6 inhibition                        |
| Dexamethasone   | H02 | Dutasteride   | G04 | 1         | Moderate     | Induction of CYP3A4 metabolism           |
| Digoxin         | C01 | Esomeprazole  | A02 | 1         | Monitor      | P-gp inhibition                          |
| Diltiazem       | C08 | Donepezil     | N06 | 1         | Monitor      | CYP3A4 inhibition                        |
| Diltiazem       | C08 | Eplerenone    | C03 | 1         | SUA          | CYP3A4 inhibition                        |
| Diltiazem       | C08 | Pioglitazone  | A10 | 1         | Monitor      | CYP3A4 inhibition                        |
| Diltiazem       | C08 | Rivaroxaban   | B01 | 1         | Monitor      | CYP3A4 inhibition                        |
| Diltiazem       | C08 | Tamsulosin    | G04 | 2         | Monitor      | CYP3A4 inhibition                        |
| Enoxaparin      | B01 | Azithromycin  | J01 | 8         | Moderate     | Decreased metabolism of enoxaparin       |
| Escitalopram    | N06 | Omeprazole    | A02 | 1         | Monitor      | CYP2C19 inhibition                       |
| Esomeprazole    | A02 | Citalopram    | N06 | 3         | Monitor      | CYP2C9 inhibition                        |

|                   |     |               |     |   |          |                                |
|-------------------|-----|---------------|-----|---|----------|--------------------------------|
| Esomeprazole      | A02 | Escitalopram  | N06 | 7 | Monitor  | CYP2C9 inhibition              |
| Ferrous gluconate | B03 | Pantoprazole  | A02 | 1 | Moderate | GI absorption                  |
| Lovastatin        | C10 | Dabigatran    | B01 | 1 | Monitor  | P-gp inhibition                |
| Magnesium         | A12 | Ciprofloxacin | J01 | 1 | Moderate | GI absorption                  |
| Magnesium         | A12 | Levofloxacin  | J01 | 4 | Moderate | GI absorption                  |
| Magnesium         | A12 | Levothyroxine | H03 | 1 | Moderate | GI absorption                  |
| Nebivolol         | C07 | Haloperidol   | N05 | 1 | Monitor  | CYP2D6 inhibition              |
| Paroxetine        | N06 | Aripiprazole  | N05 | 1 | Monitor  | CYP2D6 inhibition              |
| Paroxetine        | N06 | Haloperidol   | N05 | 1 | Monitor  | CYP2D6 inhibition              |
| Primidone         | N03 | Fluticasone   | R03 | 1 | SUA      | Induction of CYP3A4 metabolism |
| Primidone         | N03 | Roflumilast   | R03 | 1 | SUA      | Induction of CYP3A4 metabolism |
| Sertraline        | N06 | Metoprolol    | C07 | 2 | Monitor  | CYP2D6 inhibition              |
| Simvastatin       | C10 | Amlodipine    | C08 | 1 | SUA      | CYP3A4 inhibition              |
| Sulfomathoxazole  | J01 | Acenocoumarol | B01 | 1 | Monitor  | CYP2C9 inhibition              |
| Tamsulosin        | G04 | Fluoxetine    | N06 | 1 | Monitor  | CYP2D6 inhibition              |
| Tramadol          | N02 | Amlodipine    | C08 | 1 | Monitor  | CYP3A4 inhibition              |
| Verapamil         | C08 | Rivaroxaban   | B01 | 1 | Monitor  | P-gp inhibition                |
| Verapamil         | C08 | Simvastatin   | C10 | 1 | SUA      | CYP3A4 inhibition              |

Table S2 Drug combinations that may lead in pharmacodynamic DDIs as they recorded in the current study. SUA: Serious-Use alternative, Monitor: use with caution-monitor, Moderate: moderate-minor, frequency: number of cases

| Drug A      | ATC | Drug B        | ATC | Frequency | Significance | Description                                     |
|-------------|-----|---------------|-----|-----------|--------------|-------------------------------------------------|
| Abatacept   | L04 | Adalimumab    | L04 | 1         | SUA          | PD-synergism serious immunosuppression          |
| Alfuzosin   | G04 | Formoterol    | R03 | 1         | Monitor      | QT prolongation                                 |
| Alfuzosin   | G04 | Haloperidol   | N05 | 1         | Monitor      | QT prolongation                                 |
| Alfuzosin   | G04 | Salbutamol    | R03 | 2         | Monitor      | QT prolongation                                 |
| Allopurinol | M04 | Acenocoumarol | B01 | 1         | Monitor      | PD-synergism -anticoagulation -INR modulation   |
| Alprazolam  | N05 | Quetiapine    | N05 | 1         | Moderate     | PD-synergism, sedation & respiratory depression |

|               |     |                    |     |   |          |                                                 |
|---------------|-----|--------------------|-----|---|----------|-------------------------------------------------|
| Amiodarone    | C01 | Azithromycin       | J01 | 1 | Monitor  | QT prolongation                                 |
| Amiodarone    | C01 | Quetiapine         | N05 | 1 | Monitor  | QT prolongation                                 |
| Amitriptyline | N06 | Indapamide         | C03 | 1 | Monitor  | QT prolongation                                 |
| Aripiprazole  | N05 | Haloperidol        | N05 | 1 | Monitor  | QT prolongation                                 |
| Aspirin       | B01 | Dexamethasone      | H02 | 1 | Moderate | GI- ulceration                                  |
| Aspirin       | B01 | Duloxetine         | N06 | 1 | Monitor  | PD-synergism -anticoagulation -INR modulation   |
| Aspirin       | B01 | Enalapril          | C09 | 1 | Moderate | Risk of nephrotoxicity                          |
| Aspirin       | B01 | Furosemide         | C03 | 1 | Moderate | Risk of nephrotoxicity                          |
| Aspirin       | B01 | Lisinopril         | C09 | 1 | Moderate | Risk of nephrotoxicity                          |
| Aspirin       | B01 | Methylprednisolone | H02 | 1 | Moderate | GI- ulceration                                  |
| Aspirin       | B01 | Perindopril        | C09 | 3 | Moderate | Risk of nephrotoxicity                          |
| Aspirin       | B01 | Telmisartan        | C09 | 1 | Moderate | PD-synergism vasolidating effects               |
| Atenolol      | C07 | Salbutamol         | R03 | 1 | Moderate | PD-antagonism ( $\beta$ -agonists/blockers)     |
| Azithromycin  | J01 | Acenocoumarol      | B01 | 1 | Moderate | PD-synergism -anticoagulation -INR modulation   |
| Azithromycin  | J01 | Formoterol         | R03 | 1 | Monitor  | QT prolongation                                 |
| Azithromycin  | J01 | Mirtazapine        | N06 | 1 | Monitor  | QT prolongation                                 |
| Azithromycin  | J01 | Olanzapine         | N05 | 2 | Monitor  | QT prolongation                                 |
| Azithromycin  | J01 | Quetiapine         | N05 | 1 | Monitor  | QT prolongation                                 |
| Azithromycin  | J01 | Venlafaxine        | N06 | 1 | Monitor  | QT prolongation                                 |
| Bisoprolol    | C07 | Rivastigmine       | N06 | 1 | SUA      | PD-synergism cardiovascular side effects        |
| Bromazepam    | N05 | Codeine            | N02 | 4 | Monitor  | PD-synergism, sedation & respiratory depression |
| Bromazepam    | N05 | Tramadol           | N02 | 1 | Monitor  | PD-synergism, sedation & respiratory depression |
| Carvedilol    | C07 | Salbutamol         | R03 | 1 | Moderate | PD-antagonism ( $\beta$ -agonists/blockers)     |
| Cefixime      | J01 | Furosemide         | C03 | 1 | Moderate | Risk of nephrotoxicity                          |
| Ceftazidime   | J01 | Furosemide         | C03 | 1 | Moderate | Risk of nephrotoxicity                          |

|               |     |               |     |    |          |                                                 |
|---------------|-----|---------------|-----|----|----------|-------------------------------------------------|
| Ceftriaxone   | J01 | Furosemide    | C03 | 3  | Moderate | Risk of nephrotoxicity                          |
| Ciprofloxacin | J01 | Alfuzosin     | G04 | 1  | Monitor  | QT prolongation                                 |
| Ciprofloxacin | J01 | Haloperidol   | N05 | 1  | Monitor  | QT prolongation                                 |
| Ciprofloxacin | J01 | Salbutamol    | R03 | 4  | Monitor  | QT prolongation                                 |
| Citalopram    | N06 | Acenocoumarol | B01 | 1  | Moderate | PD-synergism -anticoagulation -INR modulation   |
| Citalopram    | N06 | Dabigatran    | B01 | 1  | Monitor  | PD-synergism -anticoagulation -INR modulation   |
| Citalopram    | N06 | Furosemide    | C03 | 1  | Moderate | PD-synergism -anticoagulation -INR modulation   |
| Citalopram    | N06 | Levofloxacin  | J01 | 1  | Monitor  | QT prolongation                                 |
| Clonazepam    | N03 | Bromazepam    | N05 | 1  | Monitor  | PD-synergism, sedation & respiratory depression |
| Clopidogrel   | B01 | Escitalopram  | N06 | 1  | Moderate | PD-synergism -anticoagulation -INR modulation   |
| Dexamethasone | H02 | Amlodipine    | C08 | 1  | Moderate | Induction Na+ and fluid retention               |
| Dexamethasone | H02 | Ciprofloxacin | J01 | 1  | Moderate | Risk of tendon rupture                          |
| Donepezil     | N06 | Alfuzosin     | G04 | 1  | Monitor  | QT prolongation                                 |
| Donepezil     | N06 | Escitalopram  | N06 | 2  | Monitor  | QT prolongation                                 |
| Donepezil     | N06 | Haloperidol   | N05 | 1  | Monitor  | QT prolongation                                 |
| Donepezil     | N06 | Levofloxacin  | J01 | 1  | Monitor  | QT prolongation                                 |
| Donepezil     | N06 | Moxifloxacin  | J01 | 1  | Monitor  | QT prolongation                                 |
| Donepezil     | N06 | Salbutamol    | R03 | 2  | Monitor  | QT prolongation                                 |
| Empagliflozin | A10 | Furosemide    | C03 | 1  | Moderate | PD-synergism diuretic effects                   |
| Enoxaparin    | B01 | Apixaban      | B01 | 1  | Moderate | PD-synergism -anticoagulation -INR modulation   |
| Enoxaparin    | B01 | Budesonide    | R03 | 28 | Moderate | PD-synergism -anticoagulation -INR modulation   |
| Enoxaparin    | B01 | Candesartan   | C09 | 1  | Moderate | Hyperkalemia                                    |

|            |     |                    |     |    |          |                                               |
|------------|-----|--------------------|-----|----|----------|-----------------------------------------------|
| Enoxaparin | B01 | Ceftaroline        | J01 | 5  | Moderate | PD-synergism -anticoagulation -INR modulation |
| Enoxaparin | B01 | Ceftriaxone        | J01 | 9  | Moderate | PD-synergism -anticoagulation -INR modulation |
| Enoxaparin | B01 | Citalopram         | N06 | 2  | Moderate | PD-synergism -anticoagulation -INR modulation |
| Enoxaparin | B01 | Clopidogrel        | B01 | 1  | Moderate | GI- ulceration                                |
| Enoxaparin | B01 | Dabigatran         | B01 | 1  | SUA      | PD-synergism -anticoagulation -INR modulation |
| Enoxaparin | B01 | Dexamethasone      | H02 | 2  | Moderate | PD-synergism -anticoagulation -INR modulation |
| Enoxaparin | B01 | Enalapril          | C09 | 1  | Moderate | Hyperkalemia                                  |
| Enoxaparin | B01 | Irbesartan         | C09 | 1  | Moderate | Hyperkalemia                                  |
| Enoxaparin | B01 | Lisinopril         | C09 | 1  | Moderate | Hyperkalemia                                  |
| Enoxaparin | B01 | Losartan           | C09 | 1  | Moderate | Hyperkalemia                                  |
| Enoxaparin | B01 | Methylprednisolone | H02 | 26 | Moderate | PD-synergism -anticoagulation -INR modulation |
| Enoxaparin | B01 | Nintedanib         | L01 | 1  | Moderate | PD-synergism -anticoagulation -INR modulation |
| Enoxaparin | B01 | Olmesartan         | C09 | 4  | Moderate | Hyperkalemia                                  |
| Enoxaparin | B01 | Perindopril        | C09 | 3  | Moderate | Hyperkalemia                                  |
| Enoxaparin | B01 | Piperacillin       | J01 | 13 | Moderate | PD-synergism -anticoagulation -INR modulation |
| Enoxaparin | B01 | Prednisolone       | H02 | 2  | Moderate | PD-synergism -anticoagulation -INR modulation |
| Enoxaparin | B01 | Ramipril           | C09 | 2  | Moderate | Hyperkalemia                                  |
| Enoxaparin | B01 | Sulfamethoxazole   | J01 | 1  | Moderate | PD-synergism -anticoagulation -INR modulation |
| Enoxaparin | B01 | Telmisartan        | C09 | 2  | Moderate | Hyperkalemia                                  |
| Enoxaparin | B01 | Valsartan          | C09 | 3  | Moderate | Hyperkalemia                                  |

|                    |     |                 |     |   |          |                                                 |
|--------------------|-----|-----------------|-----|---|----------|-------------------------------------------------|
| Escitalopram       | N06 | Acenocoumarol   | B01 | 1 | Moderate | PD-synergism -anticoagulation -INR modulation   |
| Escitalopram       | N06 | Ciprofloxacin   | J01 | 1 | Monitor  | QT prolongation                                 |
| Escitalopram       | N06 | Haloperidol     | N05 | 1 | Monitor  | QT prolongation                                 |
| Escitalopram       | N06 | Levofloxacin    | J01 | 4 | Monitor  | QT prolongation                                 |
| Escitalopram       | N06 | Moxifloxacin    | J01 | 1 | Monitor  | QT prolongation                                 |
| Escitalopram       | N06 | Salbutamol      | R03 | 2 | Monitor  | QT prolongation                                 |
| Fluoxetine         | N06 | Moxifloxacin    | J01 | 1 | Monitor  | QT prolongation                                 |
| Gabapentin         | N03 | Codeine         | N02 | 1 | Monitor  | PD-synergism, sedation & respiratory depression |
| Gabapentin         | N03 | Escitalopram    | N06 | 1 | Moderate | PD-synergism, sedation & respiratory depression |
| Gabapentin         | N03 | Fentanyl        | N02 | 1 | SUA      | PD-synergism, sedation & respiratory depression |
| Gabapentin         | N03 | Lorazepam       | N05 | 1 | Monitor  | PD-synergism, sedation & respiratory depression |
| Hydroxychloroquine | P01 | Citalopram      | N06 | 1 | Monitor  | QT prolongation                                 |
| Hydroxyzine        | N05 | Solifenacin     | G04 | 1 | Monitor  | QT prolongation                                 |
| Ibuprofen          | M01 | Furosemide      | C03 | 1 | Moderate | Risk of nephrotoxicity                          |
| Insulin            | A10 | Perindopril     | C09 | 2 | Moderate | PD-synergism hypoglycemia                       |
| Insulin            | A10 | Candesartan     | C09 | 1 | Moderate | PD-synergism hypoglycemia                       |
| Insulin            | A10 | Ciprofloxacin   | J01 | 2 | Moderate | PD-synergism hypoglycemia                       |
| Insulin            | A10 | Irbesartan      | C09 | 1 | Moderate | PD-synergism hypoglycemia                       |
| Insulin            | A10 | Moxifloxacin    | J01 | 2 | Moderate | PD-synergism hypoglycemia                       |
| Ipratropium        | R03 | Haloperidol     | N05 | 3 | Moderate | Additive anticholinergic effects,               |
| Ipratropium        | R03 | Levomepromazine | N05 | 1 | Moderate | PD-synergism hypoglycemia                       |
| Ipratropium        | R03 | Perphenazine    | N05 | 1 | Moderate | PD-synergism hypoglycemia                       |
| Ipratropium        | R03 | Trifluoperazine | N05 | 1 | Moderate | PD-synergism hypoglycemia                       |
| Leflunomide        | L04 | Acenocoumarol   | B01 | 1 | Monitor  | PD-synergism -anticoagulation -INR modulation   |



|                    |     |                  |     |   |          |                                                 |
|--------------------|-----|------------------|-----|---|----------|-------------------------------------------------|
| Levodopa           | N04 | Amlodipine       | C08 | 1 | Moderate | PD-synergism cardiovascular side effects        |
| Levodopa           | N04 | Betaxolol        | C07 | 1 | Moderate | PD-synergism cardiovascular side effects        |
| Levodopa           | N04 | Olmesartan       | C09 | 1 | Moderate | PD-synergism cardiovascular side effects        |
| Levofloxacin       | J01 | Acenocoumarol    | B01 | 1 | Moderate | PD-synergism -anticoagulation -INR modulation   |
| Levofloxacin       | J01 | Alfuzosin        | G04 | 1 | Monitor  | QT prolongation                                 |
| Levofloxacin       | J01 | Haloperidol      | N05 | 1 | Monitor  | QT prolongation                                 |
| Levofloxacin       | J01 | Insulin          | A10 | 6 | Moderate | PD-synergism hypoglycemia                       |
| Levofloxacin       | J01 | Mirtazapine      | N06 | 1 | Monitor  | QT prolongation                                 |
| Levofloxacin       | J01 | Olanzapine       | N05 | 1 | Monitor  | QT prolongation                                 |
| Levofloxacin       | J01 | Salbutamol       | R03 | 5 | Monitor  | QT prolongation                                 |
| Levofloxacin       | J01 | Sulfamethoxazole | J01 | 2 | Monitor  | QT prolongation                                 |
| Levofloxacin       | J01 | Trimethoprim     | J01 | 2 | Monitor  | QT prolongation                                 |
| Levofloxacin       | J01 | Vildagliptin     | A10 | 1 | Moderate | PD-synergism hypoglycemia                       |
| Levomepromazine    | N05 | Trifluoperazine  | N05 | 1 | Monitor  | QT prolongation                                 |
| Linezolid          | J01 | Caffeine         | N06 | 1 | SUA      | PD-synergism cardiovascular side effects        |
| Linezolid          | J01 | Citalopram       | N06 | 1 | SUA      | Serotonin syndrome                              |
| Linezolid          | J01 | Codeine          | N02 | 2 | SUA      | PD-synergism, sedation & respiratory depression |
| Linezolid          | J01 | Escitalopram     | N06 | 1 | SUA      | Serotonin syndrome                              |
| Linezolid          | J01 | Fentanyl         | N02 | 1 | SUA      | Serotonin syndrome                              |
| Linezolid          | J01 | Fluoxetine       | N06 | 1 | Monitor  | Serotonin syndrome                              |
| Linezolid          | J01 | Insulin          | A12 | 1 | Monitor  | PD-synergism hypoglycemia                       |
| Linezolid          | J01 | Quetiapine       | N05 | 1 | SUA      | Serotonin syndrome                              |
| Linezolid          | J01 | Salbutamol       | R03 | 3 | Monitor  | PD-synergism cardiovascular side effects        |
| Linezolid          | J01 | Tramadol         | N02 | 1 | SUA      | Serotonin syndrome                              |
| Methylprednisolone | H02 | Acenocoumarol    | B01 | 2 | Moderate | PD-synergism -anticoagulation -INR modulation   |
| Methylprednisolone | H02 | Ciprofloxacin    | J01 | 6 | Moderate | Risk of tendon rupture                          |

|                    |     |                  |     |   |          |                                                 |
|--------------------|-----|------------------|-----|---|----------|-------------------------------------------------|
| Methylprednisolone | H02 | Levofloxacin     | J01 | 7 | Moderate | Risk of tendon rupture                          |
| Methylprednisolone | H02 | Moxifloxacin     | J01 | 3 | Moderate | Risk of tendon rupture                          |
| Mirtazapine        | N06 | Clonazepam       | N03 | 1 | Monitor  | PD-synergism, sedation & respiratory depression |
| Mirtazapine        | N06 | Olanzapine       | N05 | 1 | Monitor  | QT prolongation                                 |
| Mirtazapine        | N06 | Paroxetine       | N06 | 2 | Monitor  | QT prolongation                                 |
| Mirtazapine        | N06 | Venlafaxine      | N06 | 3 | Monitor  | QT prolongation                                 |
| Moxonidine         | C02 | Bromazepam       | N05 | 1 | Moderate | PD-synergism, sedation & respiratory depression |
| Moxonidine         | C02 | Mirtazapine      | N06 | 1 | Moderate | PD-synergism, sedation & respiratory depression |
| Olanzapine         | N05 | Venlafaxine      | N06 | 1 | Monitor  | QT prolongation                                 |
| Olodaterol         | R03 | Furosemide       | C03 | 1 | Moderate | Hypokalemia                                     |
| Paroxetine         | N06 | Acenocoumarol    | B01 | 1 | Moderate | PD-synergism -anticoagulation -INR modulation   |
| Paroxetine         | N06 | Levofloxacin     | J01 | 1 | Monitor  | QT prolongation                                 |
| Paroxetine         | N06 | Moxifloxacin     | J01 | 1 | Monitor  | QT prolongation                                 |
| Paroxetine         | N06 | Quetiapine       | N05 | 1 | Monitor  | PD-synergism, sedation & respiratory depression |
| Paroxetine         | N06 | Rivaroxaban      | B01 | 1 | Monitor  | PD-synergism -anticoagulation -INR modulation   |
| Paroxetine         | N06 | Sulfamethoxazole | J01 | 1 | Monitor  | QT prolongation                                 |
| Paroxetine         | N06 | Trimethoprim     | J01 | 1 | Monitor  | QT prolongation                                 |
| Paroxetine         | N06 | Venlafaxine      | N06 | 3 | Monitor  | QT prolongation                                 |
| Perindopril        | C09 | Allopurinol      | M04 | 1 | SUA      | Anaphylaxis risk, Steven Johnson's syndrome     |
| Perindopril        | C09 | Metformin        | A10 | 1 | Moderate | PD-synergism hypoglycemia                       |
| Perphenazine       | N05 | Levomepromazine  | N05 | 1 | Monitor  | QT prolongation                                 |
| Perphenazine       | N05 | Trifluoperazine  | N05 | 1 | Monitor  | QT prolongation                                 |
| Perphenazine       | N05 | Indapamide       | C03 | 1 | Monitor  | QT prolongation                                 |

|                    |     |                 |     |   |          |                                                 |
|--------------------|-----|-----------------|-----|---|----------|-------------------------------------------------|
| Piperacillin       | J01 | Acenocoumarol   | B01 | 1 | Moderate | PD-synergism -anticoagulation -INR modulation   |
| Piperacillin       | J01 | Vancomycin      | J01 | 1 | Monitor  | Risk of nephrotoxicity                          |
| Potassium Chloride | A12 | Eplerenone      | C03 | 1 | SUA      | Hyperkalemia                                    |
| Prednisolone       | H02 | Acenocoumarol   | B01 | 1 | Moderate | PD-synergism -anticoagulation -INR modulation   |
| Prednisolone       | H02 | Ciprofloxacin   | J01 | 1 | Moderate | Risk of tendon rupture                          |
| Pregabalin         | N03 | Escitalopram    | N06 | 1 | Monitor  | PD-synergism, sedation & respiratory depression |
| Pregabalin         | N03 | Fentanyl        | N02 | 1 | Monitor  | PD-synergism, sedation & respiratory depression |
| Pregabalin         | N03 | Levocetirizine  | R06 | 2 | Monitor  | PD-synergism, sedation & respiratory depression |
| Pregabalin         | N03 | Levomepromazine | N05 | 1 | Monitor  | PD-synergism, sedation & respiratory depression |
| Pregabalin         | N03 | Lorazepam       | N05 | 1 | Monitor  | PD-synergism, sedation & respiratory depression |
| Primidone          | N03 | Bromazepam      | N05 | 1 | Monitor  | PD-synergism, sedation & respiratory depression |
| Primidone          | N03 | Codeine         | N02 | 1 | Monitor  | PD-synergism, sedation & respiratory depression |
| Quetiapine         | N05 | Aripiprazole    | N05 | 1 | Monitor  | QT prolongation                                 |
| Quetiapine         | N05 | Ciprofloxacin   | J01 | 1 | Monitor  | QT prolongation                                 |
| Quetiapine         | N05 | Donepezil       | N06 | 1 | Monitor  | QT prolongation                                 |
| Quetiapine         | N05 | Escitalopram    | N06 | 1 | Monitor  | QT prolongation                                 |
| Quetiapine         | N05 | Hydroxyzine     | N05 | 1 | Monitor  | QT prolongation                                 |
| Quetiapine         | N05 | Ipratropium     | R03 | 8 | Monitor  | PD-synergism hypoglycemia                       |
| Quetiapine         | N05 | Levodopa        | N04 | 1 | Monitor  | PD-antagonism (antidopaminergic activity)       |
| Quetiapine         | N05 | Levofloxacin    | J01 | 2 | Monitor  | QT prolongation                                 |

|                |     |                    |     |   |          |                                                 |
|----------------|-----|--------------------|-----|---|----------|-------------------------------------------------|
| Quetiapine     | N05 | Melatonin          | N05 | 1 | Moderate | PD-synergism, sedation & respiratory depression |
| Quetiapine     | N05 | Mirtazapine        | N06 | 1 | Monitor  | QT prolongation                                 |
| Quetiapine     | N05 | Olanzapine         | N05 | 1 | Monitor  | QT prolongation                                 |
| Ramipril       | C09 | Potassium Chloride | A12 | 1 | Monitor  | Hyperkalemia                                    |
| Risperidone    | N05 | Ipratropium        | R03 | 1 | Monitor  | PD-synergism hypoglycemia                       |
| Salbutamol     | R03 | Azithromycin       | J01 | 7 | Monitor  | QT prolongation                                 |
| Salbutamol     | R03 | Ephedrine          | C01 | 1 | Monitor  | PD-synergism cardiovascular side effects        |
| Salbutamol     | R03 | Fluoxetine         | N06 | 2 | Monitor  | QT prolongation                                 |
| Salbutamol     | R03 | Formoterol         | R03 | 1 | Monitor  | QT prolongation                                 |
| Salbutamol     | R03 | Furosemide         | C03 | 3 | Moderate | Hypokalemia                                     |
| Salbutamol     | R03 | Haloperidol        | N05 | 4 | Monitor  | QT prolongation                                 |
| Salbutamol     | R03 | Mirtazapine        | N06 | 2 | Monitor  | QT prolongation                                 |
| Salbutamol     | R03 | Moxifloxacin       | J01 | 4 | Monitor  | QT prolongation                                 |
| Salbutamol     | R03 | Olanzapine         | N05 | 1 | Monitor  | QT prolongation                                 |
| Salbutamol     | R03 | Ondansetron        | A04 | 1 | Monitor  | QT prolongation                                 |
| Salbutamol     | R03 | Propafenone        | C01 | 1 | Monitor  | QT prolongation                                 |
| Salbutamol     | R03 | Quetiapine         | N05 | 1 | Monitor  | QT prolongation                                 |
| Salbutamol     | R03 | Quetiapine         | N05 | 1 | Monitor  | QT prolongation                                 |
| Salmeterol     | R03 | Indapamide         | C03 | 1 | Monitor  | Hypokalemia                                     |
| Sertraline     | N06 | Acenocoumarol      | B01 | 1 | Moderate | PD-synergism -anticoagulation -INR modulation   |
| Sertraline     | N06 | Alfuzosin          | G04 | 1 | Monitor  | QT prolongation                                 |
| Sertraline     | N06 | Salbutamol         | R03 | 3 | Monitor  | QT prolongation                                 |
| Sitagliptin    | A10 | Indapamide         | C03 | 1 | Moderate | PD-antagonism hyperglycemia                     |
| Spironolactone | C03 | Potassium Chloride | A12 | 2 | Monitor  | Hyperkalemia                                    |
| Tocilizumab    | L04 | Remdesivir         | J05 | 1 | Monitor  | Induced hepatotoxicity                          |
| Topiramate     | N03 | Metformin          | A10 | 1 | Monitor  | PD hyperchloremic metabolic acidosis            |

|             |     |                  |     |   |          |                                                 |
|-------------|-----|------------------|-----|---|----------|-------------------------------------------------|
| Tramadol    | N02 | Codeine          | N02 | 1 | SUA      | PD-synergism, sedation & respiratory depression |
| Trazodone   | N06 | Escitalopram     | N06 | 1 | Monitor  | QT prolongation                                 |
| Trazodone   | N06 | Haloperidol      | N05 | 1 | Monitor  | QT prolongation                                 |
| Trazodone   | N06 | Levofloxacin     | J01 | 1 | Monitor  | QT prolongation                                 |
| Trazodone   | N06 | Salbutamol       | R03 | 1 | Monitor  | QT prolongation                                 |
| Venlafaxine | N06 | Acenocoumarol    | B01 | 1 | Moderate | PD-synergism -anticoagulation -INR modulation   |
| Venlafaxine | N06 | Aripiprazole     | N05 | 1 | Monitor  | PD-synergism, sedation & respiratory depression |
| Venlafaxine | N06 | Haloperidol      | N05 | 1 | Monitor  | QT prolongation                                 |
| Venlafaxine | N06 | Moxifloxacin     | J01 | 1 | Monitor  | QT prolongation                                 |
| Venlafaxine | N06 | Quetiapine       | N05 | 1 | Monitor  | PD-synergism, sedation & respiratory depression |
| Venlafaxine | N06 | Sulfamethoxazole | J01 | 1 | Monitor  | QT prolongation                                 |
| Venlafaxine | N06 | Trimethoprim     | J01 | 1 | Monitor  | QT prolongation                                 |
